# Supplementary material for: Tracking Cancer Evolution Reveals Constrained Routes to Metastases: TRACERx Renal
Source: PubMed Central journal article supplement — Cell. 2018 Apr 19;173(3):581–594.e12. doi: 10.1016/j.cell.2018.03.057 (PMC5938365; doi:10.1016/j.cell.2018.03.057), 2018-04-19
Supplement: mmc2.pdf [file mmc2.pdf]

**Table S2:** Comparison of driver event frequency across TRACERx, HUC and MSK cohorts. Related to Figure 1.

| driver event frequency | TRACERx Renal |     |           |     | HUC    |     |           |     | MSK    |     |           |     |
|------------------------|---------------|-----|-----------|-----|--------|-----|-----------|-----|--------|-----|-----------|-----|
|                        | clonal        |     | subclonal |     | clonal |     | subclonal |     | clonal |     | subclonal |     |
|                        | prim          | met | prim      | met | prim   | met | prim      | met | prim   | met | prim      | met |
| VHL                    | 82%           | 79% | 0%        | 0%  | 77%    | 79% | 4%        | 0%  | 82%    | 82% | 3%        | 6%  |
| PBRM1                  | 39%           | 39% | 5%        | 0%  | 46%    | 41% | 4%        | 3%  | 44%    | 50% | 15%       | 6%  |
| SETD2                  | 18%           | 27% | 21%       | 7%  | 19%    | 28% | 4%        | 0%  | 29%    | 26% | 18%       | 12% |
| PIK3CA                 | 0%            | 0%  | 13%       | 2%  | 4%     | 7%  | 0%        | 0%  | 3%     | 0%  | 3%        | 0%  |
| MTOR                   | 8%            | 11% | 16%       | 2%  | 8%     | 10% | 0%        | 0%  | 21%    | 18% | 6%        | 3%  |
| PTEN                   | 3%            | 0%  | 5%        | 0%  | 4%     | 14% | 8%        | 3%  | 6%     | 18% | 9%        | 0%  |
| KDM5C                  | 8%            | 13% | 16%       | 4%  | 19%    | 24% | 12%       | 0%  | 9%     | 15% | 9%        | 0%  |
| BAP1                   | 18%           | 27% | 8%        | 0%  | 8%     | 7%  | 0%        | 0%  | 26%    | 24% | 3%        | 6%  |
| TP53                   | 3%            | 2%  | 11%       | 2%  | 0%     | 14% | 12%       | 0%  | 15%    | 9%  | 3%        | 0%  |
| TSC1                   | 3%            | 4%  | 13%       | 2%  | 4%     | 3%  | 4%        | 0%  | 3%     | 3%  | 3%        | 3%  |
| TSC2                   | 0%            | 0%  | 3%        | 0%  | 4%     | 3%  | 4%        | 0%  | 0%     | 0%  | 9%        | 6%  |
| Gain_1q25.1            | 11%           | 20% | 21%       | 9%  | 0%     | 7%  | 12%       | 3%  | 18%    | 18% | 0%        | 0%  |
| Gain_2q14.3            | 13%           | 18% | 39%       | 11% | 23%    | 28% | 15%       | 7%  | 15%    | 18% | 3%        | 3%  |
| Gain_5q35.3            | 55%           | 64% | 16%       | 2%  | 62%    | 48% | 8%        | 14% | 47%    | 38% | 9%        | 6%  |
| Gain_7q22.3            | 29%           | 45% | 42%       | 7%  | 46%    | 48% | 15%       | 3%  | 47%    | 56% | 3%        | 0%  |
| Gain_8q24.21           | 5%            | 27% | 34%       | 5%  | 15%    | 7%  | 19%       | 21% | 29%    | 32% | 9%        | 0%  |
| Gain_12p11.21          | 16%           | 39% | 37%       | 4%  | 35%    | 31% | 19%       | 10% | 32%    | 38% | 0%        | 3%  |
| Gain_20q13.33          | 16%           | 36% | 39%       | 0%  | 19%    | 21% | 15%       | 3%  | 21%    | 35% | 0%        | 0%  |
| Loss_1p36.11           | 18%           | 45% | 47%       | 9%  | 31%    | 34% | 23%       | 3%  | 38%    | 29% | 6%        | 0%  |
| Loss_3p25.3            | 89%           | 80% | 8%        | 5%  | 88%    | 79% | 4%        | 3%  | 97%    | 65% | 0%        | 6%  |
| Loss_4q34.3            | 16%           | 36% | 32%       | 4%  | 19%    | 28% | 23%       | 3%  | 41%    | 35% | 3%        | 0%  |
| Loss_6q22.33           | 18%           | 29% | 21%       | 4%  | 23%    | 28% | 23%       | 7%  | 50%    | 38% | 0%        | 0%  |
| Loss_8p23.2            | 13%           | 13% | 26%       | 2%  | 31%    | 31% | 23%       | 7%  | 59%    | 62% | 9%        | 12% |
| Loss_9p21.3            | 26%           | 64% | 53%       | 2%  | 46%    | 66% | 19%       | 7%  | 65%    | 65% | 6%        | 3%  |
| Loss_14q31.1           | 34%           | 59% | 37%       | 2%  | 38%    | 55% | 27%       | 3%  | 62%    | 76% | 3%        | 0%  |
