# Supplementary material for: Tracking Cancer Evolution Reveals Constrained Routes to Metastases: TRACERx Renal
Source: PubMed Central journal article supplement — Cell. 2018 Apr 19;173(3):581–594.e12. doi: 10.1016/j.cell.2018.03.057 (PMC5938365; doi:10.1016/j.cell.2018.03.057), 2018-04-19
Supplement: mmc3.pdf [file mmc3.pdf]

**Table S3 HLA region allelic imbalance analysis, related to Figure 2.**

**Clonal selection analysis:**

| <b>Selected</b> | <b>Not Selected</b> | <b>NA*</b> |
|-----------------|---------------------|------------|
| 12              | 2                   | 12         |

\*includes cases with no-LOH in either primary or metastasis  
Binomial test (selected vs not selected) P=0.000462

**Matched patient analysis:**

|                                |               | <b><u>Metastatic regions:</u></b> |              |           |              |
|--------------------------------|---------------|-----------------------------------|--------------|-----------|--------------|
|                                |               | <b>No-LOH</b>                     | <b>LOH</b>   |           |              |
| <b><u>Primary Regions:</u></b> | <b>No-LOH</b> | 12                                | 4            | <b>17</b> | <b>37.0%</b> |
|                                | <b>LOH</b>    | 1                                 | 9            | <b>10</b> |              |
|                                |               | <b>14</b>                         | <b>13</b>    |           |              |
|                                |               |                                   | <b>50.0%</b> |           |              |

McNemar's test P=0.37.

Notes:

- 1) McNemar's test does not account for subclonal (primary) to clonal (metastases) selection, which is the prevalent mechanism, rather than newly acquired (*de novo*) events private to metastases (only 5.4% of events were *de novo*). Hence we see a discrepancy between the two test results.
- 2) In the clonal selection analysis, the null background selection rate used for the binomial test is the same passenger SCNA rate as used in Figure 2C. We acknowledge the limitation of this approach, *i.e.* the potential for assay specific differences between HLA detection (polymorphic STR markers) and passenger SCNA rate estimation (NGS based analysis).
- 3) NGS detection of HLA imbalance using the recently published LOHHLA tool was not possible from custom panel data.
