# Supplementary material for: Tracking Cancer Evolution Reveals Constrained Routes to Metastases: TRACERx Renal
Source: PubMed Central journal article supplement — Cell. 2018 Apr 19;173(3):581–594.e12. doi: 10.1016/j.cell.2018.03.057 (PMC5938365; doi:10.1016/j.cell.2018.03.057), 2018-04-19
Supplement: mmc4.pdf [file mmc4.pdf]

**Table S4:** TRACERx renal FFPE samples sequenced.  
Related to Star methods.

| <b>Patient</b> | <b>Metastatic site</b> | <b>Number of FFPE samples</b> | <b>Timing</b> |
|----------------|------------------------|-------------------------------|---------------|
| K107           | ADRENAL                | 2                             | Synchronous   |
| K153           | LUNG                   | 1                             | Metachronous  |
| K228           | ADRENAL (direct)       | 2                             | Synchronous   |
| K376           | ADRENAL (direct)       | 1                             | Synchronous   |
| K029           | BONE_RIB               | 1                             | Metachronous  |
| K029           | BONE_SPINE             | 1                             | Metachronous  |
| K066           | PERI-NEPHRIC_FAT       | 1                             | Synchronous   |
| K066           | PERI-RENAL             | 2                             | Synchronous   |
| K208           | BONE_SPINE             | 2                             | Synchronous   |
| K096           | ADRENAL                | 2                             | Synchronous   |
| K096           | PARA AORTIC LYMPH NODE | 1                             | Synchronous   |
| K096           | HILAR LYMPH NODE       | 1                             | Synchronous   |
