# Supplementary material for: Tracking Cancer Evolution Reveals Constrained Routes to Metastases: TRACERx Renal
Source: PubMed Central journal article supplement — Cell. 2018 Apr 19;173(3):581–594.e12. doi: 10.1016/j.cell.2018.03.057 (PMC5938365; doi:10.1016/j.cell.2018.03.057), 2018-04-19
Supplement: mmc5.pdf [file mmc5.pdf]

**Table S5:** Oligonucleotide sequence for VHL exon amplification and methylation specific PCR. Related to Star methods.

| Oligonucleotide name | Oligonucleotide Sequence 5'-3' |
|----------------------|--------------------------------|
| VHL_X1_F             | gtggaaatacagtaacgagttgg        |
| VHL_X1_R             | caggcaaaaattgagaactgg          |
| VHL_X2_F             | aaccttgctgtcccgata             |
| VHL_X2_R             | caggcaaaaattgagaactgg          |
| VHL_X3a_F            | ctgccactgaggatttggt            |
| VHL_X3a_R            | ccatcaaagctgagatgaaa           |
| VHL_methylation_1F   | gagtttttaggttatttttgtaat       |
| VHL_methylation_1R,  | tcaccctaaatataatcctacctcaaaa   |
| VHL_methylation_2F   | cccctctaaaattaatatttt          |
| VHL_methylation_2R   | ggtaaggtgtagtgagttaagtt        |
